# Supplementary material for: Analysis of Metabolites and Metabolic Pathways of Three Chinese Jujube Cultivar
Source: MDPI journal article supplement (doi:10.3390/metabo13060714), 2023-05-31
Supplement: s1 [file s1]

Table S5 unique differential metabolites in LZ vs MZ

| N<br>O. | Metabolite                                             | Class | Chromatographic |      | VIP | FC  | typ<br>e |
|---------|--------------------------------------------------------|-------|-----------------|------|-----|-----|----------|
|         |                                                        |       | peak area       |      |     |     |          |
|         |                                                        |       | LZ              | MZ   |     |     |          |
| 1       | Taxifolin(Dihydroquercetin )                           |       | 1277993         | 7829 | 1.0 | 0.0 | do       |
| 2       | Benzaldehyde                                           |       | 3540267         | 8    | 6   | 6   | wn       |
| 3       | Quercetin-3-O-(2''-O-arabinosyl)rutinoside             |       | 25115333        | 1054 | 1.2 | 0.3 | do       |
| 4       | Luteolin-7-O-(6''-sinapoyl)glucoside                   |       | 87386           | 583  | 5   |     | wn       |
| 5       | Guanine                                                |       | 3039133         | 8382 | 1.2 | 0.3 | do       |
| 6       | 4-O-Glucosyl-4-hydroxybenzoic acid                     |       | 3785700         | 467  | 4   | 3   | wn       |
| 7       | Kaempferol-7-O-glucuronide                             |       | 1008547         | 3000 | 1.2 | 0.3 | do       |
| 8       | Dambonitol                                             |       | 1820733         | 1    | 1   | 4   | wn       |
| 9       | L-Prolyl-L-Leucine                                     |       | 1475267         | 1095 | 1.2 | 0.3 | do       |
| 10      | Syringaresinol-4'-O-glucoside                          |       | 362233          | 833  | 5   | 6   | wn       |
| 11      | Querspicatin A                                         |       | 3316733         | 1372 | 1.2 | 0.3 | do       |
| 12      | Kaempferol-3-O-(6''-p-Coumaroyl)glucoside (Tiliroside) |       | 259160          | 000  | 5   | 6   | wn       |
| 13      | Garbanzol                                              |       | 85988           | 3647 | 1.2 | 0.3 | do       |
| 14      | Aromadendrin (Dihydrokaempferol)                       |       | 364487          | 83   | 3   | 6   | wn       |
| 15      | 6-O-Caffeoylarbutin                                    |       | 1336033         | 6685 | 1.2 | 0.3 | do       |
| 16      | Cinnamtannin B2                                        |       | 4206300         | 00   |     | 7   | wn       |
| 17      | 24,30-Dihydroxy-12(13)-enolupinol                      |       | 68164000        | 5474 | 1.2 | 0.3 | do       |
| 18      | LysoPG 16:0                                            |       | 1129900         | 37   | 4   | 7   | wn       |
|         |                                                        |       |                 | 1345 | 1.2 | 0.3 | do       |
|         |                                                        |       |                 | 57   | 4   | 7   | wn       |
|         |                                                        |       |                 | 1234 | 1.2 | 0.3 | do       |
|         |                                                        |       |                 | 700  | 4   | 7   | wn       |
|         |                                                        |       |                 | 9808 | 1.2 | 0.3 | do       |
|         |                                                        |       |                 | 8    | 6   | 8   | wn       |
|         |                                                        |       |                 | 3391 | 1.2 | 0.3 | do       |
|         |                                                        |       |                 | 9    | 4   | 9   | wn       |
|         |                                                        |       |                 | 1404 | 1.2 | 0.3 | do       |
|         |                                                        |       |                 | 03   | 4   | 9   | wn       |
|         |                                                        |       |                 | 5233 | 1.2 | 0.3 | do       |
|         |                                                        |       |                 | 43   | 3   | 9   | wn       |
|         |                                                        |       |                 | 1648 | 1.1 | 0.3 | do       |
|         |                                                        |       |                 | 000  | 9   | 9   | wn       |
|         |                                                        |       |                 | 2760 | 1.2 | 0.4 | do       |
|         |                                                        |       |                 | 3667 | 6   |     | wn       |
|         |                                                        |       |                 | 4484 | 1.2 | 0.4 | do       |
|         |                                                        |       |                 | 23   |     |     | wn       |

|    |                                                                 |          |      |     |     |    |
|----|-----------------------------------------------------------------|----------|------|-----|-----|----|
| 19 | Indole-3-Acetaldehyde                                           | 7309600  | 3010 | 1.2 | 0.4 | do |
|    |                                                                 |          | 000  | 5   | 1   | wn |
| 20 | D-Glucuronic acid                                               | 2169667  | 8897 | 1.1 | 0.4 | do |
|    |                                                                 |          | 73   | 9   | 1   | wn |
| 21 | Betulinic acid                                                  | 69365333 | 2824 | 1.2 | 0.4 | do |
|    |                                                                 |          | 8000 | 4   | 1   | wn |
| 22 | Kaempferol-3-O-(2''-O-acetyl)glucuronide                        | 182823   | 7471 | 1.2 | 0.4 | do |
|    |                                                                 |          | 3    | 5   | 1   | wn |
| 23 | 2-hydroxy-3 $\beta$ -trans-p-hydroxycinnamoyloxy oleanolic acid | 3441133  | 1421 | 1.2 | 0.4 | do |
|    |                                                                 |          | 033  | 4   | 1   | wn |
| 24 | 1-Aminocyclopropane-1-carboxylic acid                           | 108959   | 4537 | 1.1 | 0.4 | do |
|    |                                                                 |          | 9    | 7   | 2   | wn |
| 25 | N-Acetyl-D-galactosamine                                        | 790143   | 3322 | 1.1 | 0.4 | do |
|    |                                                                 |          | 17   | 9   | 2   | wn |
| 26 | Ursolaldehyde                                                   | 1110840  | 4620 | 1.1 | 0.4 | do |
|    |                                                                 |          | 37   | 8   | 2   | wn |
| 27 | Morin                                                           | 392477   | 1739 | 1.2 | 0.4 | do |
|    |                                                                 |          | 33   | 2   | 4   | wn |
| 28 | Eriodictyol-7-O-Rutinoside (Eriocitrin)                         | 347943   | 1527 | 1.2 | 0.4 | do |
|    |                                                                 |          | 23   | 1   | 4   | wn |
| 29 | Sinapoyleputrescine                                             | 366543   | 1654 | 1.2 | 0.4 | do |
|    |                                                                 |          | 70   | 4   | 5   | wn |
| 30 | $\beta$ -Pseudouridine                                          | 463973   | 2118 | 1.2 | 0.4 | do |
|    |                                                                 |          | 73   | 5   | 6   | wn |
| 31 | 2R-hydroxy-9Z,12Z,15Z-octadecatrienoic acid                     | 286507   | 1317 | 1.1 | 0.4 | do |
|    |                                                                 |          | 03   | 7   | 6   | wn |
| 32 | Kaempferide-3-O-glucuronide                                     | 86399    | 4010 | 1.1 | 0.4 | do |
|    |                                                                 |          | 8    | 3   | 6   | wn |
| 33 | Salicin                                                         | 244853   | 1160 | 1.1 | 0.4 | do |
|    |                                                                 |          | 54   | 1   | 7   | wn |
| 34 | N-Oleoylethanolamine                                            | 424797   | 1987 | 1.2 | 0.4 | do |
|    |                                                                 |          | 30   | 2   | 7   | wn |
| 35 | Eucommioside                                                    | 89716    | 4224 | 1.2 | 0.4 | do |
|    |                                                                 |          | 6    |     | 7   | wn |
| 36 | LysoPE 15:1                                                     | 225193   | 1062 | 1.2 | 0.4 | do |
|    |                                                                 |          | 50   | 1   | 7   | wn |
| 37 | N-Acetylcadaverine                                              | 152280   | 7252 | 1.1 | 0.4 | do |
|    |                                                                 |          | 1    | 6   | 8   | wn |
| 38 | zizyberenalic acid                                              | 482827   | 2305 | 1.2 | 0.4 | do |
|    |                                                                 |          | 17   | 1   | 8   | wn |
| 39 | Diosmetin-7-O-(6''-malonyl)glucoside                            | 437337   | 2100 | 1.2 | 0.4 | do |
|    |                                                                 |          | 60   | 1   | 8   | wn |

|    |                                        |                                |          |              |          |          |          |
|----|----------------------------------------|--------------------------------|----------|--------------|----------|----------|----------|
| 40 | N1,N10-Bis(p-coumaroyl)s<br>permidine  |                                | 355297   | 1748<br>40   | 1.1<br>7 | 0.4<br>9 | do<br>wn |
| 41 | Apigenin-7-O-(6"-malonyl)<br>glucoside |                                | 142843   | 6980<br>3    | 1.2<br>3 | 0.4<br>9 | do<br>wn |
| 42 | 12-Hydroxydodecanoic<br>acid           | Lipids                         | 48947    | 1062<br>44   | 1.1<br>2 | 2.1<br>7 | up       |
| 43 | N7-Methylguanosine                     | Nucleotides and<br>derivatives | 532130   | 1162<br>047  | 1.1<br>7 | 2.1<br>8 | up       |
| 44 | Methylenesuccinic acid                 | Organic acids                  | 149277   | 3340<br>87   | 1.1      | 2.2<br>4 | up       |
| 45 | LysoPE 14:0(2n isomer)                 | Lipids                         | 370353   | 8304<br>20   | 1.2<br>3 | 2.2<br>4 | up       |
| 46 | S-(5'-Adenosyl)-L-methioni<br>ne       | Amino acids and<br>derivatives | 12448333 | 2856<br>4333 | 1.2<br>1 | 2.2<br>9 | up       |
| 47 | Kaempferol-7-O-glucoside               | Flavonoids                     | 343073   | 8355<br>43   | 1.2<br>4 | 2.4<br>4 | up       |
| 48 | Methyl 3-O-Methyl Gallate              | Phenolic acids                 | 35151    | 8635<br>2    | 1.2<br>4 | 2.4<br>6 | up       |
| 49 | Galangin-7-O-glucoside                 | Flavonoids                     | 212877   | 5329<br>70   | 1.1<br>6 | 2.5      | up       |
| 50 | 10,16-Dihydroxypalmitic<br>acid        | Lipids                         | 124400   | 3137<br>60   | 1.2<br>3 | 2.5<br>2 | up       |
| 51 | 9,16-Dihydroxypalmitic<br>acid         | Lipids                         | 4811333  | 1236<br>4000 | 1.2<br>3 | 2.5<br>7 | up       |
| 52 | Trans dehydrorosinone                  | Others                         | 294817   | 7623<br>77   | 1.2<br>3 | 2.5<br>9 | up       |
| 53 | LysoPC 14:0                            | Lipids                         | 4571567  | 1214<br>1667 | 1.2<br>5 | 2.6<br>6 | up       |
| 54 | 5'-Deoxy-5'-(methylthio)ad<br>enosine  | Nucleotides and<br>derivatives | 4489167  | 1222<br>3667 | 1.2<br>5 | 2.7<br>2 | up       |

Chromatographic peak area is the relative content of metabolites, chromatographic peak area = average; VIP value represents the variable importance projection value; FC stands for differential multiple.

Table S6 unique differential metabolites in LZ vs STZ

| NO | Metabolite                                 | Chromatographic peak area |          | VIP  | FC   | type |
|----|--------------------------------------------|---------------------------|----------|------|------|------|
|    |                                            | LZ                        | STZ      |      |      |      |
| 1  | 8-Azaguanine                               | 5280133                   | 1649533  | 1.08 | 0.31 | down |
|    | Sideretin                                  | 233757                    | 72868    | 1.11 | 0.31 | down |
| 2  | (5,7,8-Trihydroxy-6-methoxyco<br>umarin)   |                           |          |      |      |      |
| 3  | L-Prolyl-L-Phenylalanine                   | 312117                    | 98065    | 1.24 | 0.31 | down |
| 4  | Xanthine                                   | 1384300                   | 473773   | 1.1  | 0.34 | down |
| 5  | Coniferin                                  | 15963000                  | 5518233  | 1.25 | 0.35 | down |
| 6  | Nystose                                    | 111320                    | 39342    | 1.26 | 0.35 | down |
| 7  | Naringenin<br>(5,7,4'-Trihydroxyflavanone) | 69371                     | 25293    | 1.19 | 0.36 | down |
| 8  | DL-2-hydroxystearic acid                   | 426843                    | 165130   | 1.26 | 0.39 | down |
| 9  | 2R-Hydroxyoctadecanoic Acid                | 413900                    | 163433   | 1.26 | 0.39 | down |
| 10 | 2,5-Dihydroxybenzaldehyde                  | 1753633                   | 707643   | 1.23 | 0.4  | down |
| 11 | Salicylic acid                             | 1727067                   | 705127   | 1.23 | 0.41 | down |
| 12 | Genipin                                    | 302770                    | 130983   | 1.26 | 0.43 | down |
| 13 | 3-O-trans-p-Coumaroyltormen<br>tic acid    | 469197                    | 199560   | 1.26 | 0.43 | down |
| 14 | 4-Hydroxybenzoic acid                      | 2391067                   | 1040540  | 1.23 | 0.44 | down |
| 15 | Hesperetin-7-O-(6"-malonyl)gl<br>ucoside   | 183037                    | 80087    | 1.21 | 0.44 | down |
| 16 | 6-C-Glucosyl-2-Hydroxynarin<br>genin       | 18015667                  | 8060967  | 1.18 | 0.45 | down |
| 17 | Aromadendrin-7-O-glucoside                 | 17018000                  | 7722033  | 1.23 | 0.45 | down |
| 18 | D-Saccharic acid                           | 6003300                   | 2779367  | 1.09 | 0.46 | down |
| 19 | LysoPE 18:2                                | 19415667                  | 8938600  | 1.28 | 0.46 | down |
| 20 | Isoceanothic acid                          | 20896667                  | 9644233  | 1.03 | 0.46 | down |
| 21 | Hypoxanthine                               | 1602067                   | 747333   | 1.14 | 0.47 | down |
| 22 | LysoPE 16:1                                | 180960000                 | 84983000 | 1.28 | 0.47 | down |
| 23 | Indole-5-carboxylic acid                   | 409843                    | 197150   | 1.27 | 0.48 | down |

|    |                                                |          |           |      |      |      |
|----|------------------------------------------------|----------|-----------|------|------|------|
| 24 | Methyl dioxindole-3-acetate                    | 566403   | 274550    | 1.24 | 0.48 | down |
| 25 | D-Maltotetraose                                | 97931    | 46628     | 1.22 | 0.48 | down |
| 26 | L-Homocystine                                  | 126563   | 62270     | 1.23 | 0.49 | down |
| 27 | Ferulic acid-4-O-glucoside                     | 1452067  | 716370    | 1.28 | 0.49 | down |
| 28 | Epicatechin-3'-O- $\beta$ -D-glucopyranoside   | 14363667 | 7050867   | 1.06 | 0.49 | down |
| 29 | LysoPC 18:3                                    | 4630100  | 2277033   | 1.19 | 0.49 | down |
| 30 | LysoPC 18:3(2n isomer)                         | 4630100  | 2277033   | 1.19 | 0.49 | down |
| 31 | Luteolin-7,3'-di-O-glucoside                   | 526133   | 262470    | 1.15 | 0.5  | down |
| 32 | Mangiferonic acid                              | 68634667 | 137513333 | 1.26 | 2    | up   |
| 33 | Trigonelline                                   | 22051667 | 45062000  | 1.27 | 2.04 | up   |
| 34 | Xanthosine                                     | 1051030  | 2140067   | 1.25 | 2.04 | up   |
| 35 | Orotic acid                                    | 743640   | 1551267   | 1.25 | 2.09 | up   |
| 36 | 3-Hydroxypyridine                              | 57370    | 121487    | 1.24 | 2.12 | up   |
| 37 | Fustin                                         | 3580267  | 7885433   | 1.25 | 2.2  | up   |
| 38 | 4-Hydroxy-5-(2-oxo-1-pyrrolidinyl)benzoic acid | 2657067  | 5872367   | 1.23 | 2.21 | up   |
| 39 | Coclaurine                                     | 46799000 | 104283333 | 1.23 | 2.23 | up   |
| 40 | 10-Dehydrogeniposide                           | 153079   | 341933    | 1.11 | 2.23 | up   |
| 41 | Quinic Acid                                    | 45742333 | 103103000 | 1.27 | 2.25 | up   |
| 42 | N-benzylformamide                              | 3051533  | 6909533   | 1.25 | 2.26 | up   |
| 43 | N-Phenylacetyl glycine                         | 67666    | 154070    | 1.24 | 2.28 | up   |
| 44 | 3-Oxooleana-11,13(18)-dien-28-oic acid         | 119751   | 275080    | 1.16 | 2.3  | up   |
| 45 | N-(2-Hydroxy-4-methoxyphenyl)acetamide         | 3694333  | 8568000   | 1.25 | 2.32 | up   |
| 46 | L-Tyrosine                                     | 8417033  | 19565667  | 1.25 | 2.32 | up   |
| 47 | N-Acetylisatin                                 | 757500   | 1760867   | 1.2  | 2.32 | up   |
| 48 | L-Ascorbic acid (Vitamin C)                    | 85084667 | 211253333 | 1.26 | 2.48 | up   |
| 49 | Isocitric Acid                                 | 110618   | 274607    | 1.26 | 2.48 | up   |
| 50 | 4-(3,4,5-Trihydroxybenzoyl)benzoic acid        | 20274667 | 51323667  | 1.27 | 2.53 | up   |
| 51 | D-Pantothenic Acid                             | 4305933  | 11841000  | 1.27 | 2.75 | up   |

|    |                            |          |          |      |       |    |
|----|----------------------------|----------|----------|------|-------|----|
| 52 | Barbituric acid            | 4507700  | 12529000 | 1.26 | 2.78  | up |
| 53 | Procyanidin A6 procyanidin | 67774    | 204167   | 1.26 | 3.01  | up |
| 54 | 2-Phenylpropionic Acid     | 18693    | 61026    | 1.24 | 3.26  | up |
| 55 | Tormentic Acid             | 44165    | 147107   | 1.21 | 3.33  | up |
| 56 | LysoPC 16:0(2n isomer)     | 10427633 | 20999333 | 1.22 | 3.47  | up |
| 57 | N-Acetyl-L-tyrosine        | 20387    | 294139   | 1.09 | 14.43 | up |

---

Table S7 unique differential metabolites in STZ vs MZ

| N<br>O | Metabolite                                                                | Chromatographic peak area |          | VIP  | FC   | type |
|--------|---------------------------------------------------------------------------|---------------------------|----------|------|------|------|
|        |                                                                           | STZ                       | MZ       |      |      |      |
| 1      | N-Acetyl-L-Arginine                                                       | 5320767                   | 379173   | 1.06 | 0.07 | down |
| 2      | N-Acetyl-L-Aspartic Acid                                                  | 217477                    | 40404    | 1.11 | 0.19 | down |
| 3      | LysoPC 20:1                                                               | 783760                    | 171743   | 1.14 | 0.22 | down |
| 4      | Quercetin-3-O-arabinoside<br>(Guaijaverin)                                | 571693                    | 178443   | 1.26 | 0.31 | down |
| 5      | Jujuboside B1                                                             | 263590                    | 91509    | 1.21 | 0.35 | down |
| 6      | 3-Cyano-L-alanine                                                         | 295507                    | 107214   | 1.22 | 0.36 | down |
| 7      | L-Cyclopentylglycine                                                      | 5169267                   | 1842367  | 1.22 | 0.36 | down |
| 8      | Vitexin-2''-O-rhamnoside                                                  | 1205357                   | 432653   | 1.17 | 0.36 | down |
| 9      | 3-Ureidopropionic Acid                                                    | 15554667                  | 5784700  | 1.21 | 0.37 | down |
| 10     | O-Acetylserine                                                            | 2040833                   | 760827   | 1.25 | 0.37 | down |
| 11     | Apiferol                                                                  | 665300                    | 246570   | 1.18 | 0.37 | down |
| 12     | Diosmetin-6-C-glucoside                                                   | 167043                    | 61667    | 1.18 | 0.37 | down |
| 13     | 2 $\alpha$ ,3 $\alpha$ ,19 $\alpha$ -Trihydroxyursolic acid               | 257677                    | 96014    | 1.17 | 0.37 | down |
| 14     | Epigallocatechin                                                          | 7637467                   | 2906600  | 1.24 | 0.38 | down |
| 15     | Phloretin                                                                 | 1124203                   | 443883   | 1.22 | 0.39 | down |
| 16     | LysoPC 19:2                                                               | 177223                    | 68260    | 1.2  | 0.39 | down |
| 17     | Hispidulin-7-O-Glucoside                                                  | 13580667                  | 5468300  | 1.25 | 0.4  | down |
| 18     | 2'-Deoxyadenosine                                                         | 1386200                   | 573140   | 1.26 | 0.41 | down |
| 19     | 2 $\alpha$ ,3 $\alpha$ ,19 $\alpha$ ,23-Tetrahydroxyurs-12-en-28-oic acid | 212747                    | 87540    | 1.06 | 0.41 | down |
| 20     | LysoPE 20:2                                                               | 166910                    | 68111    | 1.09 | 0.41 | down |
| 21     | Quercetin-3-O-rutinoside-7-O-rhamnoside                                   | 266603                    | 109810   | 1.1  | 0.41 | down |
| 22     | 1-O-Galloyl- $\beta$ -D-glucose                                           | 5553800                   | 2327600  | 1.25 | 0.42 | down |
| 23     | Kaempferol-3,7-O-dirhamnoside (Kaempferitrin)                             | 53750667                  | 22705667 | 1.21 | 0.42 | down |
| 24     | 3-Hydroxypropanoic acid                                                   | 456870                    | 195200   | 1.26 | 0.43 | down |
| 25     | 9-Hydroxy-12-oxo-10(E),15(                                                | 351163                    | 150917   | 1.22 | 0.43 | down |

|    |                                                            |           |          |      |      |      |
|----|------------------------------------------------------------|-----------|----------|------|------|------|
|    | Z)-octadecadienoic acid                                    |           |          |      |      |      |
| 26 | 1-(sn-Glycero-3-phospho)-1<br>D-myo-inositol               | 205856667 | 90421667 | 1.15 | 0.44 | down |
| 27 | Diosmetin-7-O-glucoside                                    | 12223000  | 5380400  | 1.25 | 0.44 | down |
| 28 | Epitheaflavic<br>acid-3-O-Gallate                          | 15120333  | 6778567  | 1.21 | 0.45 | down |
| 29 | Procyanidin C1                                             | 5077900   | 2305800  | 1.15 | 0.45 | down |
| 30 | 1-(4-Methoxyphenyl)-1-pro<br>panol                         | 1750567   | 812417   | 1.24 | 0.46 | down |
| 31 | Chelidonic acid                                            | 28021667  | 13023333 | 1.21 | 0.46 | down |
| 32 | 4'-Hydroxy-5,7-dimethoxyfl<br>avanone                      | 2455933   | 1122737  | 1.22 | 0.46 | down |
| 33 | 2,6-Diaminooimelic acid                                    | 507540    | 240760   | 1.23 | 0.47 | down |
| 34 | Geniposide                                                 | 395927    | 191597   | 1.1  | 0.48 | down |
| 35 | Procyanidin C2                                             | 23926333  | 11453200 | 1.18 | 0.48 | down |
| 36 | N6-Acetyl-L-lysine                                         | 1837733   | 901160   | 1.16 | 0.49 | down |
| 37 | Orientin-7-O-glucoside                                     | 8074033   | 3970967  | 1.25 | 0.49 | down |
| 38 | Hydroxytyrosol                                             | 1641000   | 813707   | 1.26 | 0.5  | down |
| 39 | LysoPC 12:0                                                | 17067333  | 34697667 | 1.21 | 2.03 | up   |
| 40 | Dihydroferuloylputrescine                                  | 182820    | 373397   | 1.23 | 2.04 | up   |
| 41 | 6-Methoxykaempferol-3-O-<br>glucoside                      | 1937100   | 3980633  | 1.12 | 2.05 | up   |
| 42 | Tamarixetin-3-O-rutinoside                                 | 776470    | 1593933  | 1.18 | 2.05 | up   |
| 43 | N-Glycyl-L-leucine                                         | 189600    | 391673   | 1.24 | 2.07 | up   |
| 44 | D-Threonic Acid                                            | 6786067   | 14316333 | 1.1  | 2.11 | up   |
| 45 | Esculetin                                                  | 234837    | 510800   | 1.2  | 2.18 | up   |
| 46 | O-Nornuciferine<br>(N-Methylasimilobine)(Flor<br>ibundine) | 272847    | 595047   | 1.23 | 2.18 | up   |
| 47 | 9,12,13-Trihydroxy-10,15-oc<br>tadecadienoic acid          | 552817    | 1243633  | 1.24 | 2.25 | up   |
| 48 | 1-O-Caffeoyl-β-D-glucose                                   | 1891667   | 4283600  | 1.25 | 2.26 | up   |
| 49 | 1-Linoleoylglycerol                                        | 57142     | 129330   | 1.2  | 2.26 | up   |
| 50 | Crepenynic acid                                            | 643990    | 1468033  | 1.22 | 2.28 | up   |
| 51 | Isorhamnetin-3-O-rutinosid                                 | 1992567   | 4564633  | 1.21 | 2.29 | up   |



|    |                                              |        |         |      |      |    |
|----|----------------------------------------------|--------|---------|------|------|----|
|    | e (Narcissin)                                |        |         |      |      |    |
| 52 | $\gamma$ -Linolenic Acid                     | 612657 | 1427133 | 1.24 | 2.33 | up |
| 53 | Isorhamnetin-3-O-Glucosid<br>e               | 186543 | 454333  | 1.18 | 2.44 | up |
| 54 | Cis-4,7,10,13,16,19-Docosah<br>exaenoic Acid | 249560 | 615857  | 1.23 | 2.47 | up |
| 55 | N-Acetyl-L-phenylalanine                     | 890820 | 2417500 | 1.25 | 2.71 | up |
| 56 | Quercetin-3-O-sophoroside<br>(Baimaside)     | 577727 | 1647233 | 1.25 | 2.85 | up |
| 57 | Quercetin-3-O-(6''-O-acetyl)<br>galactoside  | 194133 | 750793  | 1.21 | 3.87 | up |

---
